# Supplementary material
Source: PubMed Central journal article supplement (PMC535365)

A

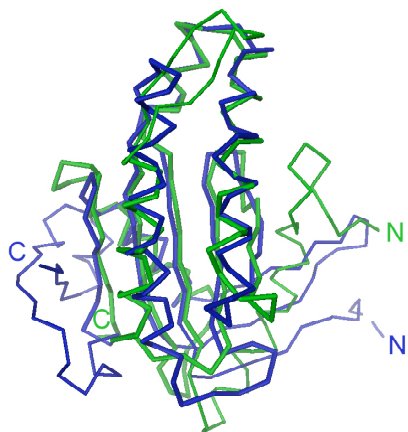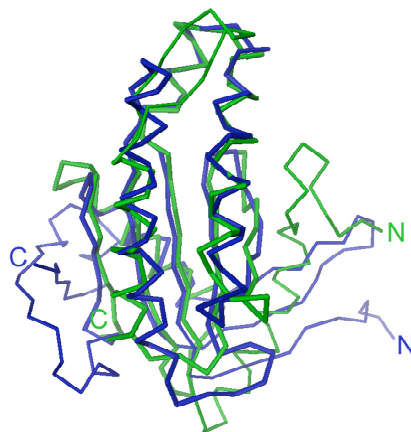

B

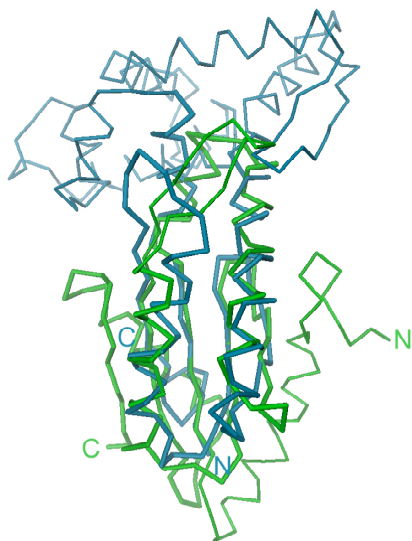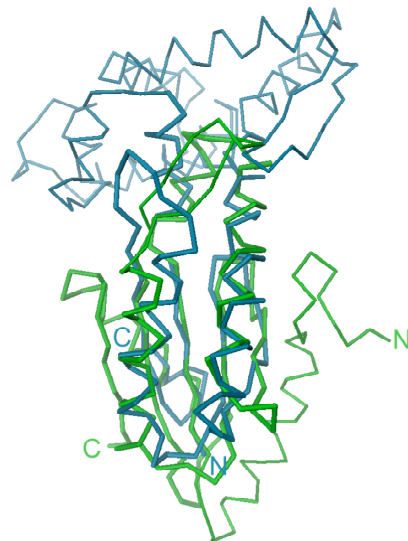

Supplement: pnas_101_49_17084__1.pdf [file pnas_101_49_17084__1.pdf]

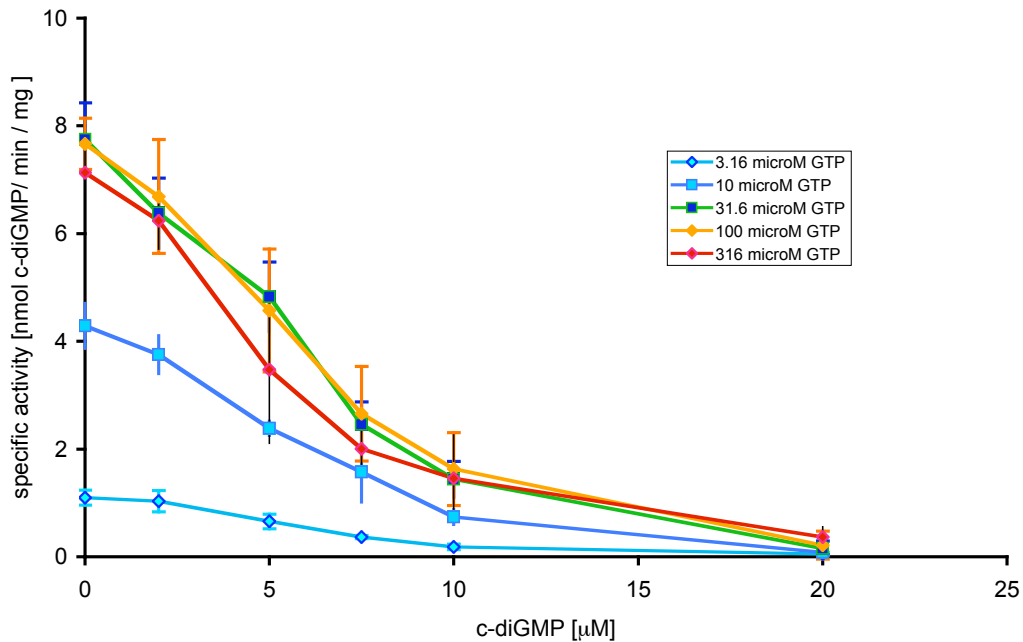

Supplement: pnas_101_49_17084__2.pdf [file pnas_101_49_17084__2.pdf]
